# Supplementary material for: Visceral adiposity index (VAI), lipid accumulation product (LAP), and product of triglycerides and glucose (TyG) to discriminate prediabetes and diabetes
Source: PubMed Central journal article supplement (PMC6609728; doi:10.1038/s41598-019-46187-8), 2019-07-04
Supplement: 41598_2019_46187_MOESM1_ESM.pdf [file 41598_2019_46187_MOESM1_ESM.pdf]

## <Supplementary Information>

Article in *Scientific Reports*

### **Visceral adiposity index (VAI), lipid accumulation product (LAP), and product of triglycerides and glucose (TyG) to discriminate prediabetes and diabetes**

Nayeon Ahn<sup>1,2</sup>, Sebastian Edgar Baumeister<sup>1</sup>, Ute Amann<sup>1</sup>, Wolfgang Rathmann<sup>3</sup>, Annette Peters<sup>4</sup>, Cornelia Huth<sup>4</sup>, Barbara Thorand<sup>4</sup>, Christa Meisinger<sup>1,5</sup>

<sup>1</sup> Chair of Epidemiology, Ludwig-Maximilians-Universität München, UNIKA-T Augsburg, Augsburg, Germany

<sup>2</sup> The Institute of Medical Informatics, Biometry and Epidemiology (IBE), Ludwig-Maximilians-University of Munich, Munich, Germany

<sup>3</sup> Institute for Biometrics and Epidemiology, German Diabetes Center, Leibniz Center for Diabetes Research at Heinrich Heine University, Düsseldorf, Germany

<sup>4</sup> Institute of Epidemiology, Helmholtz Zentrum München, German Research Center for Environmental Health, Neuherberg, Germany

<sup>5</sup> Independent Research Group Clinical Epidemiology, Helmholtz Zentrum München, German Research Center for Environmental Health, Neuherberg, Germany

**Supplemental table S1. General Distribution of cut-off value with corresponding predictive values of VAI, LAP, and TyG**

|                  | Sensitivity | Specificity | PPV   | NPV   | AUC (95% CI)        | P-value  | DLR(+) | DLR(-) | YI    | Cut-offs |
|------------------|-------------|-------------|-------|-------|---------------------|----------|--------|--------|-------|----------|
| <b>Overall</b>   |             |             |       |       |                     |          |        |        |       |          |
| VAI              | 0.645       | 0.629       | 0.432 | 0.802 | 0.687 (0.662-0.712) | <0.001 † | 1.738  | 0.565  | 0.274 | 1.52     |
| LAP              | 0.698       | 0.663       | 0.475 | 0.834 | 0.743 (0.720-0.765) | <0.01 ‡  | 2.073  | 0.456  | 0.361 | 41.30    |
| TyG              | 0.732       | 0.658       | 0.484 | 0.849 | 0.762 (0.740-0.784) | <0.001 § | 2.142  | 0.408  | 0.390 | 8.60     |
| <b>Men</b>       |             |             |       |       |                     |          |        |        |       |          |
| VAI              | 0.433       | 0.792       | 0.562 | 0.693 | 0.649 (0.613-0.685) | <0.001 † | 2.076  | 0.716  | 0.224 | 2.33     |
| LAP              | 0.595       | 0.727       | 0.574 | 0.744 | 0.701 (0.667-0.735) | 0.025 ‡  | 2.179  | 0.558  | 0.322 | 56.70    |
| TyG              | 0.666       | 0.663       | 0.550 | 0.762 | 0.721 (0.687-0.754) | <0.001 § | 1.974  | 0.504  | 0.328 | 8.75     |
| <b>Women</b>     |             |             |       |       |                     |          |        |        |       |          |
| VAI              | 0.755       | 0.582       | 0.358 | 0.885 | 0.720 (0.685-0.755) | <0.001 † | 1.807  | 0.421  | 0.337 | 1.32     |
| LAP              | 0.802       | 0.613       | 0.390 | 0.909 | 0.760 (0.728-0.793) | 0.047 ‡  | 2.074  | 0.323  | 0.415 | 30.40    |
| TyG              | 0.720       | 0.705       | 0.429 | 0.891 | 0.782 (0.751-0.814) | <0.001 § | 2.438  | 0.398  | 0.425 | 8.53     |
| <b>Age≥ 65</b>   |             |             |       |       |                     |          |        |        |       |          |
| VAI              | 0.525       | 0.702       | 0.676 | 0.555 | 0.639 (0.580-0.699) | 0.142 †  | 1.762  | 0.676  | 0.227 | 1.87     |
| LAP              | 0.592       | 0.675       | 0.684 | 0.583 | 0.665 (0.607-0.723) | 0.052 ‡  | 1.825  | 0.604  | 0.268 | 49.95    |
| TyG              | 0.508       | 0.781       | 0.734 | 0.573 | 0.697 (0.641-0.753) | <0.001 § | 2.326  | 0.629  | 0.290 | 8.85     |
| <b>Age&lt;65</b> |             |             |       |       |                     |          |        |        |       |          |
| VAI              | 0.650       | 0.637       | 0.384 | 0.839 | 0.695 (0.667-0.723) | <0.001 † | 1.790  | 0.549  | 0.287 | 1.52     |
| LAP              | 0.695       | 0.682       | 0.432 | 0.865 | 0.750 (0.724-0.776) | <0.01 ‡  | 2.184  | 0.447  | 0.377 | 41.30    |
| TyG              | 0.752       | 0.671       | 0.443 | 0.886 | 0.772 (0.747-0.797) | <0.001 § | 2.287  | 0.370  | 0.423 | 8.60     |

DLR, Diagnostic Likelihood Ratio; YI, Youden Index; PPV, positive predictive value; NPV, negative predictive value

† P-value of ROC test between the area under the curve (AUC) value for visceral adiposity index (VAI) and that of lipid accumulation product (LAP).

‡ P-value of ROC test between the area under the curve (AUC) value for LAP and that of the product of triglycerides and glucose (TyG).

§ P-value of ROC test between the area under the curve (AUC) value for TyG and VAI.

**Supplemental table S2. Performance of markers for identifying persons with prediabetes/diabetes, according to sex and age**

| Marker  | Population | ROC coefficient | P- value | AUC (95% CI)* |                     |
|---------|------------|-----------------|----------|---------------|---------------------|
| VAI     | Overall    | 40yrs           | -0.0089  | 0.0725        | 0.702 (0.654-0.745) |
|         |            | 55yrs           |          |               | 0.667 (0.641-0.695) |
|         |            | 70yrs           |          |               | 0.631 (0.591-0.678) |
|         | Men        | 40yrs           | -0.0066  | 0.3025        | 0.666 (0.611-0.721) |
|         |            | 55yrs           |          |               | 0.640 (0.604-0.677) |
|         |            | 70yrs           |          |               | 0.613 (0.540-0.676) |
|         | Women      | 40yrs           | -0.0069  | 0.3750        | 0.707 (0.629-0.778) |
|         |            | 55yrs           |          |               | 0.681 (0.638-0.721) |
|         |            | 70yrs           |          |               | 0.654 (0.585-0.720) |
| LAP     | Overall    | 40yrs           | -0.0107  | 0.0250        | 0.747 (0.702-0.786) |
|         |            | 55yrs           |          |               | 0.709 (0.684-0.734) |
|         |            | 70yrs           |          |               | 0.668 (0.623-0.713) |
|         | Men        | 40yrs           | -0.0060  | 0.3425        | 0.699 (0.642-0.755) |
|         |            | 55yrs           |          |               | 0.675 (0.639-0.713) |
|         |            | 70yrs           |          |               | 0.651 (0.581-0.715) |
|         | Women      | 40yrs           | -0.0065  | 0.4100        | 0.728 (0.651-0.800) |
|         |            | 55yrs           |          |               | 0.704 (0.664-0.746) |
|         |            | 70yrs           |          |               | 0.679 (0.613-0.741) |
| TyG     | Overall    | 40yrs           | -0.0110  | 0.0250        | 0.769 (0.727-0.808) |
|         |            | 55yrs           |          |               | 0.732 (0.709-0.755) |
|         |            | 70yrs           |          |               | 0.692 (0.650-0.734) |
|         | Men        | 40yrs           | -0.0059  | 0.3750        | 0.725 (0.670-0.775) |
|         |            | 55yrs           |          |               | 0.703 (0.668-0.738) |
|         |            | 70yrs           |          |               | 0.680 (0.607-0.740) |
|         | Women      | 40yrs           | -0.0100  | 0.1900        | 0.762 (0.689-0.832) |
|         |            | 55yrs           |          |               | 0.729 (0.688-0.768) |
|         |            | 70yrs           |          |               | 0.693 (0.630-0.754) |
| HOMA-IR | Overall    | 40yrs           | -0.0004  | 0.9475        | 0.777 (0.735-0.818) |
|         |            | 55yrs           |          |               | 0.776 (0.754-0.799) |
|         |            | 70yrs           |          |               | 0.775 (0.735-0.813) |
|         | Men        | 40yrs           | -0.0020  | 0.7525        | 0.770 (0.718-0.819) |
|         |            | 55yrs           |          |               | 0.764 (0.730-0.796) |
|         |            | 70yrs           |          |               | 0.757 (0.696-0.812) |
|         | Women      | 40yrs           | 0.0051   | 0.5675        | 0.754 (0.675-0.823) |
|         |            | 55yrs           |          |               | 0.772 (0.736-0.808) |
|         |            | 70yrs           |          |               | 0.790 (0.725-0.845) |

\*AUC (95% CI), area under the ROC curve (95% Confidence Interval). A direct methodology ROC regression models incorporating age as covariate.

**Supplemental figure S3. Influence of sex and age on the area under the ROC curve (AUC) by direct non-parametric ROC regression models.**

**VAI**

**Overall**

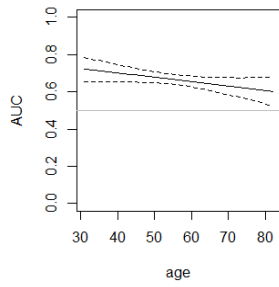

**Men**

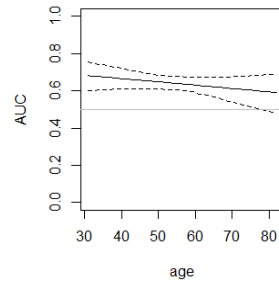

**Women**

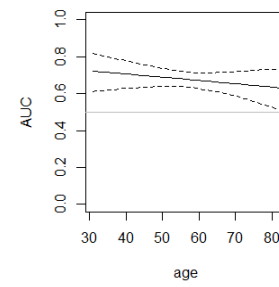

**LAP**

**Overall**

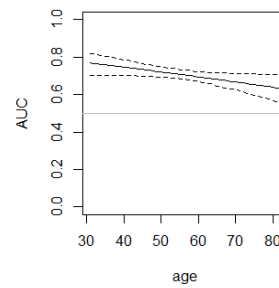

**Men**

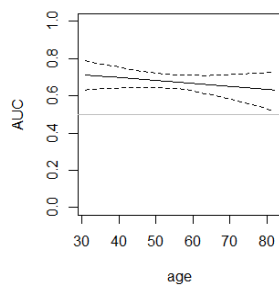

**Women**

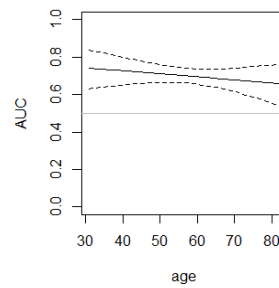

**TyG**

**Overall**

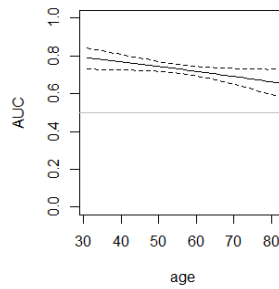

**Men**

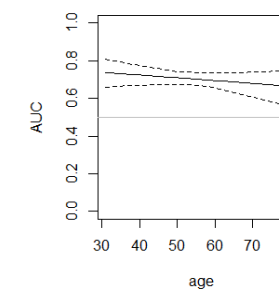

**Women**

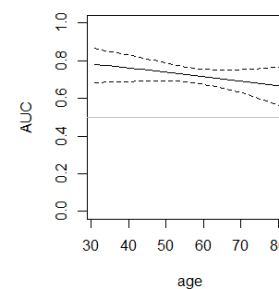

# HOMA-IR

## Overall

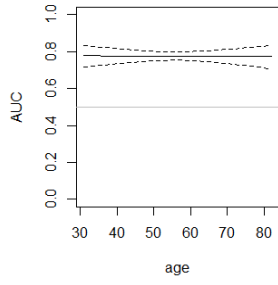

## Men

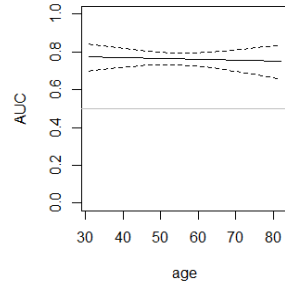

## Women

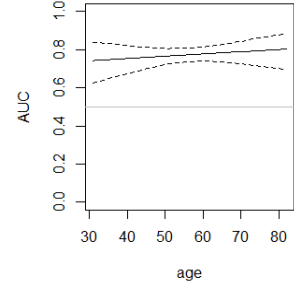

**Supplemental table S4. Sensitivity analysis (1) of the discriminatory accuracy and cut-off values for VAI, LAP, TyG, and HOMA-IR**

|                  | Sensitivity | Specificity | PPV   | NPV   | AUC (95% CI)        | YI    | Cut-offs | P-value† |
|------------------|-------------|-------------|-------|-------|---------------------|-------|----------|----------|
| <b>Overall</b>   |             |             |       |       |                     |       |          |          |
| VAI              | 0.675       | 0.604       | 0.415 | 0.817 | 0.691 (0.665-0.716) | 0.279 | 1.44     | 0.853    |
| LAP              | 0.694       | 0.673       | 0.469 | 0.841 | 0.746 (0.723-0.770) | 0.368 | 41.30    | 0.821    |
| TyG              | 0.734       | 0.669       | 0.480 | 0.858 | 0.765 (0.742-0.788) | 0.402 | 8.60     | 0.861    |
| HOMA-IR          | 0.631       | 0.796       | 0.563 | 0.838 | 0.789 (0.767-0.812) | 0.427 | 2.37     | 0.945    |
| <b>Men</b>       |             |             |       |       |                     |       |          |          |
| VAI              | 0.434       | 0.801       | 0.565 | 0.703 | 0.658 (0.621-0.695) | 0.234 | 2.33     | 0.190    |
| LAP              | 0.596       | 0.734       | 0.572 | 0.753 | 0.706 (0.671-0.741) | 0.331 | 56.70    | 0.096    |
| TyG              | 0.657       | 0.689       | 0.558 | 0.771 | 0.727 (0.693-0.761) | 0.346 | 8.78     | 0.065    |
| HOMA-IR          | 0.687       | 0.722       | 0.595 | 0.794 | 0.779 (0.748-0.810) | 0.408 | 2.27     | 0.652    |
| <b>Women</b>     |             |             |       |       |                     |       |          |          |
| VAI              | 0.736       | 0.598       | 0.347 | 0.886 | 0.715 (0.678-0.753) | 0.334 | 1.34     | 0.354    |
| LAP              | 0.805       | 0.608       | 0.373 | 0.915 | 0.760 (0.726-0.794) | 0.413 | 29.60    | 0.667    |
| TyG              | 0.714       | 0.711       | 0.418 | 0.896 | 0.780 (0.747-0.813) | 0.425 | 8.53     | 0.451    |
| HOMA-IR          | 0.571       | 0.861       | 0.543 | 0.874 | 0.786 (0.752-0.820) | 0.432 | 2.57     | 0.988    |
| <b>Age≥65</b>    |             |             |       |       |                     |       |          |          |
| VAI              | 0.527       | 0.711       | 0.693 | 0.548 | 0.643 (0.578-0.709) | 0.237 | 1.87     | 0.283    |
| LAP              | 0.613       | 0.678       | 0.702 | 0.586 | 0.669 (0.605-0.733) | 0.291 | 49.95    | 0.359    |
| TyG              | 0.513       | 0.802       | 0.762 | 0.571 | 0.697 (0.635-0.758) | 0.315 | 8.85     | 0.448    |
| HOMA-IR          | 0.633       | 0.860       | 0.848 | 0.654 | 0.793 (0.740-0.847) | 0.493 | 2.65     | 0.965    |
| <b>Age&lt;65</b> |             |             |       |       |                     |       |          |          |
| VAI              | 0.644       | 0.644       | 0.377 | 0.844 | 0.696 (0.667-0.725) | 0.288 | 1.52     | 0.852    |
| LAP              | 0.683       | 0.691       | 0.425 | 0.867 | 0.750 (0.723-0.776) | 0.374 | 41.30    | 0.807    |
| TyG              | 0.751       | 0.751       | 0.442 | 0.891 | 0.773 (0.747-0.799) | 0.432 | 8.60     | 0.967    |
| HOMA-IR          | 0.642       | 0.766       | 0.479 | 0.864 | 0.783 (0.758-0.809) | 0.408 | 2.27     | 0.905    |

Sensitivity analysis excluding individuals taking statins (n, (%)); Men: 66 (6.9%), Women: 63 (5.7%)

VAI, visceral adiposity index; LAP, lipid accumulation product; TyG, triglyceride and glucose PPV, positive predictive value; NPV, negative predictive value; YI, Youden Index

† P-value of receiver operating characteristic (ROC) test between AUC of each marker from original dataset and sensitivity analysis dataset, respectively.

**Supplemental table S5. Sensitivity analysis (2) of the discriminatory accuracy and cut-off values for VAI, LAP, TyG, and HOMA-IR**

|                  | Sensitivity | Specificity | PPV   | NPV   | AUC (95% CI)        | YI    | Cut-offs | P-value† |
|------------------|-------------|-------------|-------|-------|---------------------|-------|----------|----------|
| <b>Overall</b>   |             |             |       |       |                     |       |          |          |
| VAI              | 0.678       | 0.604       | 0.419 | 0.816 | 0.690 (0.664-0.716) | 0.281 | 1.44     | 0.970    |
| LAP              | 0.697       | 0.671       | 0.472 | 0.840 | 0.746 (0.722-0.769) | 0.367 | 41.30    | 0.964    |
| TyG              | 0.735       | 0.668       | 0.483 | 0.857 | 0.765 (0.742-0.788) | 0.404 | 8.60     | 0.995    |
| HOMA-IR          | 0.662       | 0.765       | 0.544 | 0.843 | 0.789 (0.767-0.811) | 0.427 | 2.27     | 0.999    |
| <b>Men</b>       |             |             |       |       |                     |       |          |          |
| VAI              | 0.433       | 0.800       | 0.569 | 0.698 | 0.657 (0.620-0.693) | 0.233 | 2.33     | 0.522    |
| LAP              | 0.594       | 0.733       | 0.575 | 0.747 | 0.704 (0.670-0.739) | 0.326 | 56.70    | 0.600    |
| TyG              | 0.661       | 0.688       | 0.564 | 0.769 | 0.726 (0.692-0.760) | 0.349 | 8.78     | 0.579    |
| HOMA-IR          | 0.681       | 0.731       | 0.607 | 0.790 | 0.779 (0.749-0.810) | 0.412 | 2.29     | 0.928    |
| <b>Women</b>     |             |             |       |       |                     |       |          |          |
| VAI              | 0.737       | 0.597       | 0.347 | 0.887 | 0.716 (0.679-0.753) | 0.334 | 1.34     | 0.510    |
| LAP              | 0.806       | 0.606       | 0.373 | 0.915 | 0.760 (0.726-0.794) | 0.412 | 29.60    | 0.595    |
| TyG              | 0.716       | 0.708       | 0.416 | 0.896 | 0.780 (0.747-0.813) | 0.424 | 8.53     | 0.619    |
| HOMA-IR          | 0.573       | 0.859       | 0.541 | 0.874 | 0.786 (0.752-0.819) | 0.432 | 2.57     | 0.957    |
| <b>Age≥65</b>    |             |             |       |       |                     |       |          |          |
| VAI              | 0.535       | 0.715       | 0.703 | 0.550 | 0.648 (0.584-0.713) | 0.251 | 1.87     | 0.137    |
| LAP              | 0.619       | 0.683       | 0.711 | 0.587 | 0.673 (0.610-0.736) | 0.302 | 49.95    | 0.695    |
| TyG              | 0.523       | 0.805       | 0.771 | 0.572 | 0.703 (0.642-0.763) | 0.327 | 8.85     | 0.867    |
| HOMA-IR          | 0.716       | 0.764       | 0.793 | 0.681 | 0.785 (0.731-0.839) | 0.480 | 2.25     | 0.647    |
| <b>Age&lt;65</b> |             |             |       |       |                     |       |          |          |
| VAI              | 0.644       | 0.643       | 0.380 | 0.842 | 0.694 (0.664-0.723) | 0.288 | 1.,52    | 0.495    |
| LAP              | 0.683       | 0.689       | 0.426 | 0.865 | 0.748 (0.721-0.774) | 0.371 | 41.30    | 0.817    |
| TyG              | 0.749       | 0.681       | 0.443 | 0.889 | 0.772 (0.746-0.797) | 0.430 | 860      | 0.873    |
| HOMA-IR          | 0.582       | 0.829       | 0.535 | 0.854 | 0.784 (0.759-0.809) | 0.411 | 2.53     | 0.828    |

Sensitivity analysis excluding individuals taking statins, but including individuals with previous MI and/or stroke (Overall: 1934, Men: 903, Women:1031)

VAI, visceral adiposity index; LAP, lipid accumulation product; TyG, triglyceride and glucose PPV, positive predictive value; NPV, negative predictive value; YI, Youden Index

† P-value of receiver operating characteristic (ROC) test between AUC of each marker from original dataset and sensitivity analysis dataset, respectively.
